# Supplementary material for: Polystyrene-bound thioxanthone – a heterogeneous photocatalyst for alcohol oxidation via singlet oxygen production
Source: Royal Society of Chemistry journal article supplement (doi:10.1039/d5cy01464f), 2026-01-01
Supplement: d5cy01464f1.pdf [file d5cy01464f1.pdf]

## Supporting Information

# Polystyrene-Bound Thioxanthone – A Heterogenous Photocatalyst for Alcohol Oxidation via Singlet Oxygen Production

Max Schmallegger,<sup>\*a</sup> Luis Herbst,<sup>a,b</sup> Renata Raptova,<sup>a</sup> Mathias Wiech,<sup>a</sup> Dana Dvoranova,<sup>c</sup> Dmytro Neshchadin,<sup>a</sup> Michal Zalibera<sup>c</sup>

### Contents

|                                                |    |
|------------------------------------------------|----|
| <i>Photos of Reference Polystyrene Systems</i> | 2  |
| <i>ATR-IR Spectra</i>                          | 3  |
| <i><sup>1</sup>H NMR Spectra</i>               | 4  |
| <i>EPR Spectra</i>                             | 8  |
| <i>Gas Sorption Measurements</i>               | 9  |
| <i>References</i>                              | 10 |

## Photos of Reference Polystyrene Systems

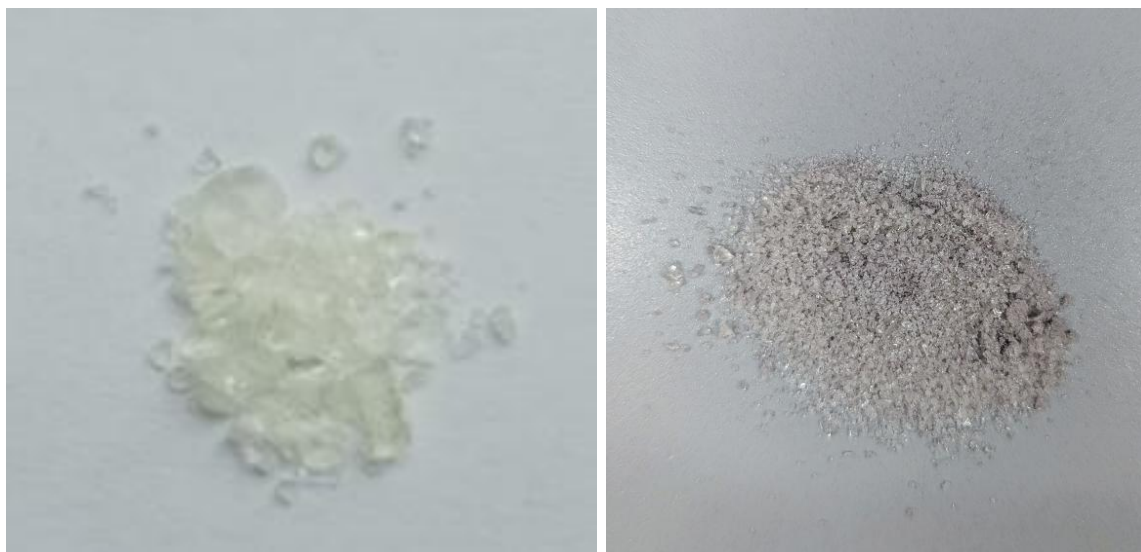

**Scheme S1.** Photograph of polystyrene (left) and polystyrene heated in sulfuric acid at 65° C for 3 hours (right) rationalizing that the colour change in **TX@PS** is due to the formation of covalently bound thioxanthone moieties

## ATR-IR Spectra

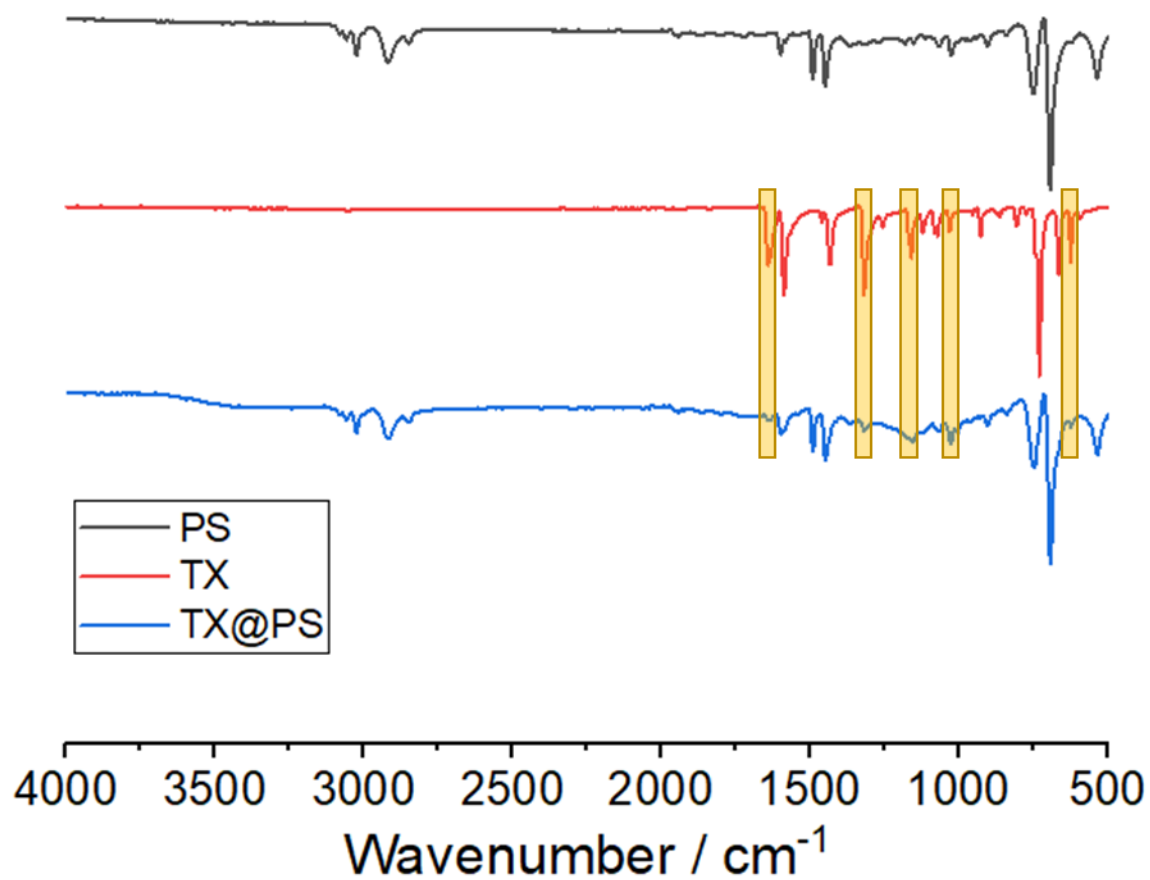

**Figure S1.** FT-IR of **PS** (black), **TX** (red) and **TX@PS**; all spectra were recorded in solid state in reflectance mode – yellow lines indicate characteristic vibrations corresponding to **TX** rationalizing the formation of photo-active moieties on the PS backbone

## <sup>1</sup>H NMR Spectra

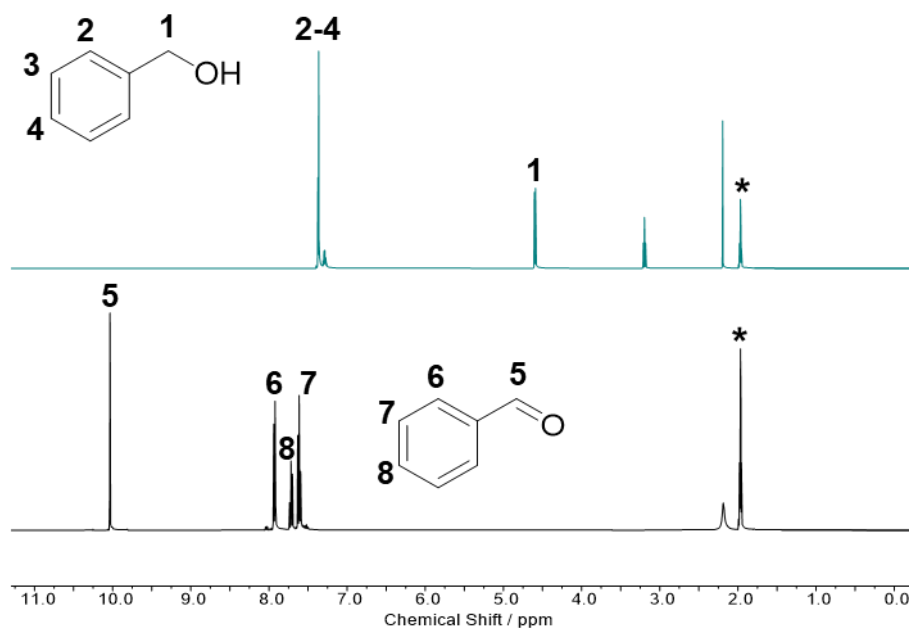

**Figure S2.** Reference <sup>1</sup>H-NMR spectra and signal assignment of benzyl alcohol (top; signals labelled 1-4) and benzaldehyde (bottom, signals labelled 5 - 8) in CH<sub>3</sub>CN-d<sub>3</sub>; the solvent peak is denoted by an asterisk

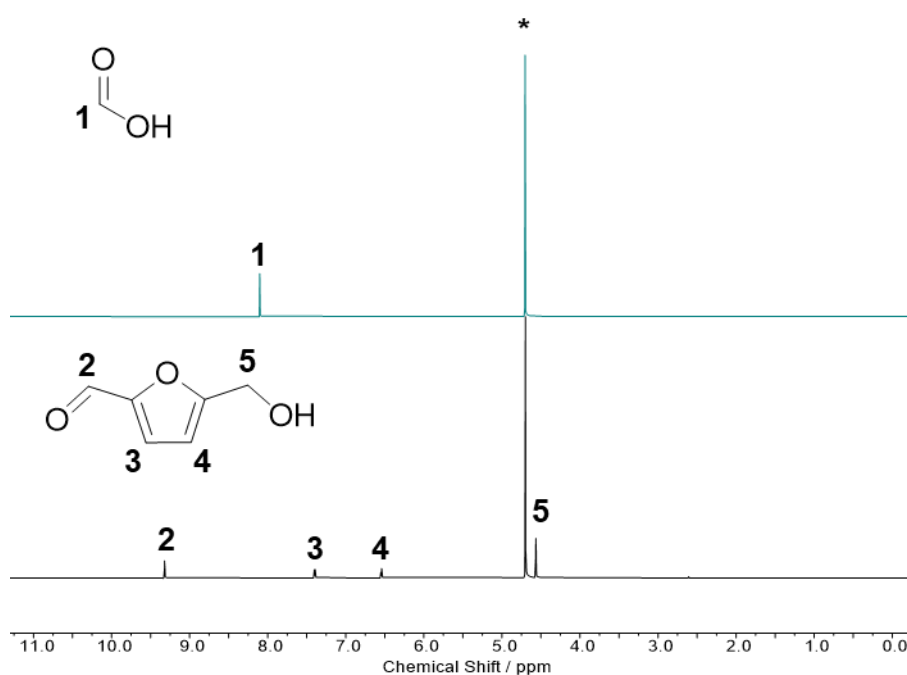

**Figure S3.** Reference <sup>1</sup>H-NMR spectra and signal assignment of formic acid (top, signal labelled 1) and 5-HMF (bottom, signals labelled 2-5) in H<sub>2</sub>O-d<sub>2</sub>; the solvent peak is denoted by an asterisk

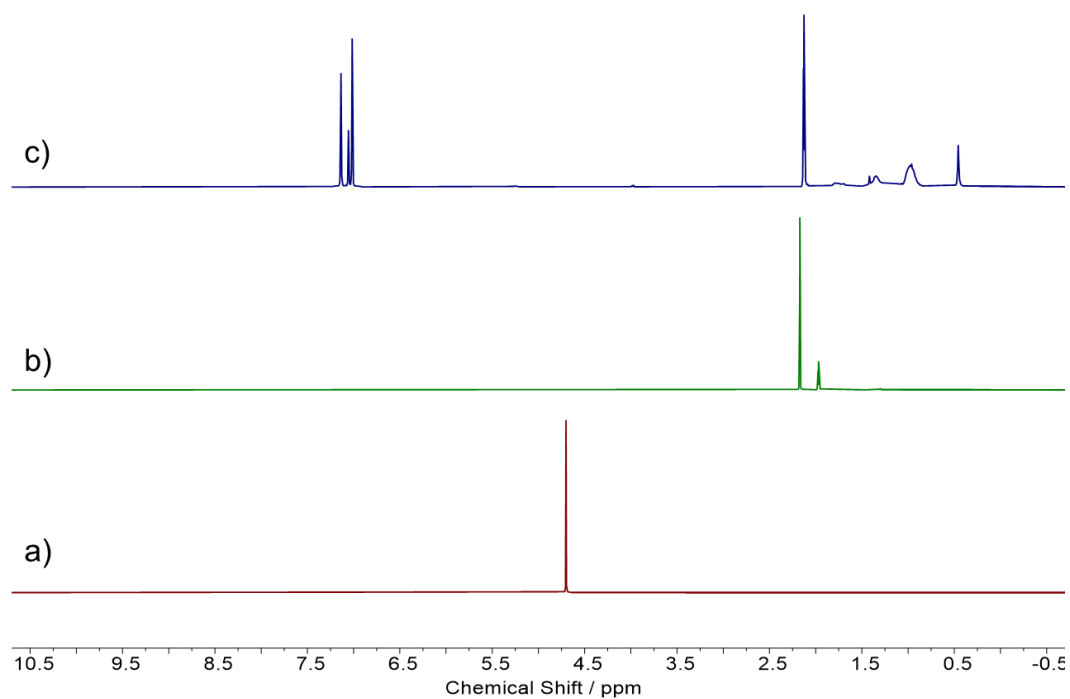

**Figure S4.**  $^1\text{H}$ -NMR spectra of **TX@PS** after storage in a)  $\text{H}_2\text{O}-\text{d}_2$ , b)  $\text{CH}_3\text{CN}-\text{d}_3$  or c) toluene- $\text{d}_8$  at  $70^\circ\text{C}$  for 24 h; in  $\text{H}_2\text{O}-\text{d}$  and  $\text{CH}_3\text{CN}-\text{d}_3$ , only solvent peaks are detected, rationalizing the stability of **TX@PS**, whilst in new peaks are detected, indicating that **TX@PS** is not stable under these experimental conditions

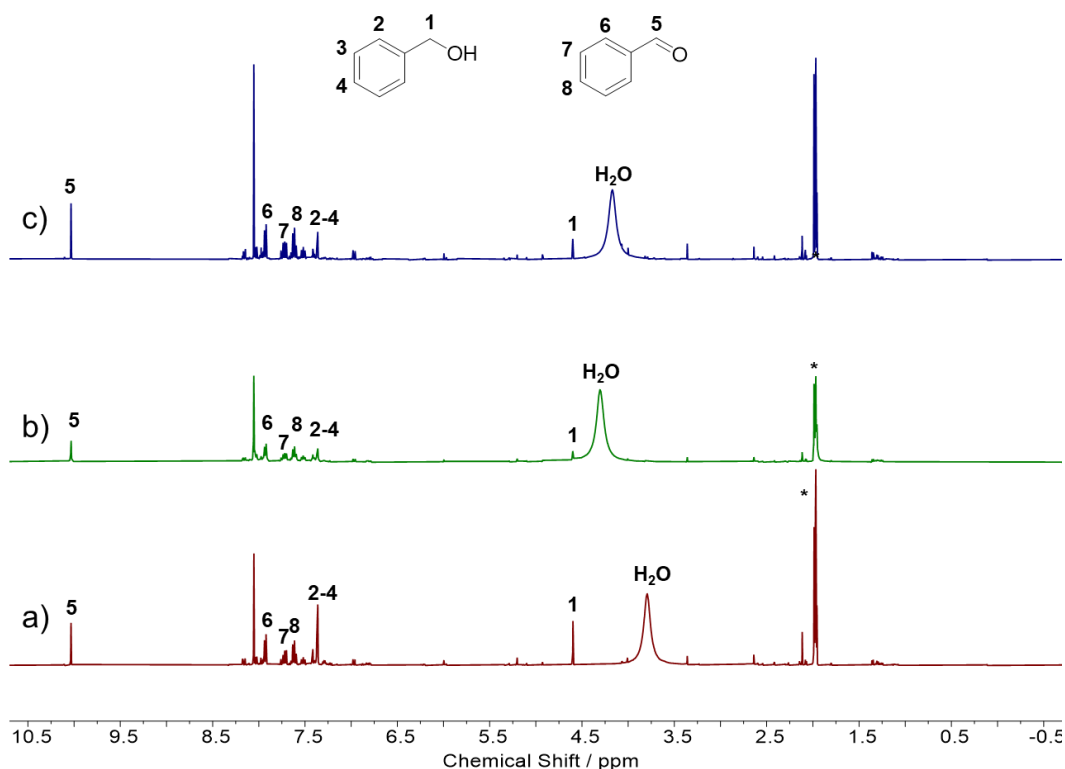

**Figure S5.**  $^1\text{H}$ -NMR spectra of **TX@PS** in the presence of benzyl alcohol upon irradiation (18h, 405 nm) with a) fresh catalyst, b) re-used catalyst (once) or c) re-used catalyst (twice); signals labelled 1 – 4 correspond to the educt benzyl alcohol, signals labelled 5 – 8 correspond to the product benzaldehyde; spectra were recorded in  $\text{CH}_3\text{CN-d}_3$ ; the solvent peak is denoted by an asterisk

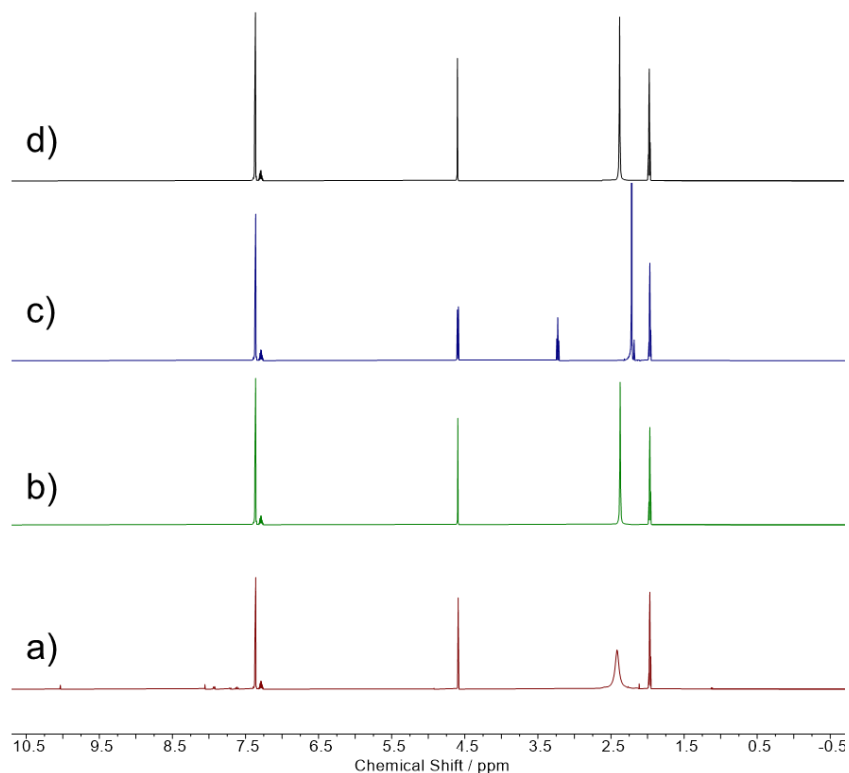

**Figure S6.** Reference  $^1\text{H}$ -NMR spectra of benzyl alcohol; a) in the presence of **TX@PS** upon irradiation for 4h; b) in the presence of **TX@PS** without irradiation (18h); c) in the absence of **TX@PS** upon irradiation (18h); d) in the presence of **TX@PS** without irradiation (18h) at elevated temperature ( $T = 70^\circ\text{C}$ ); spectra were recorded in  $\text{CH}_3\text{CN-d}_3$

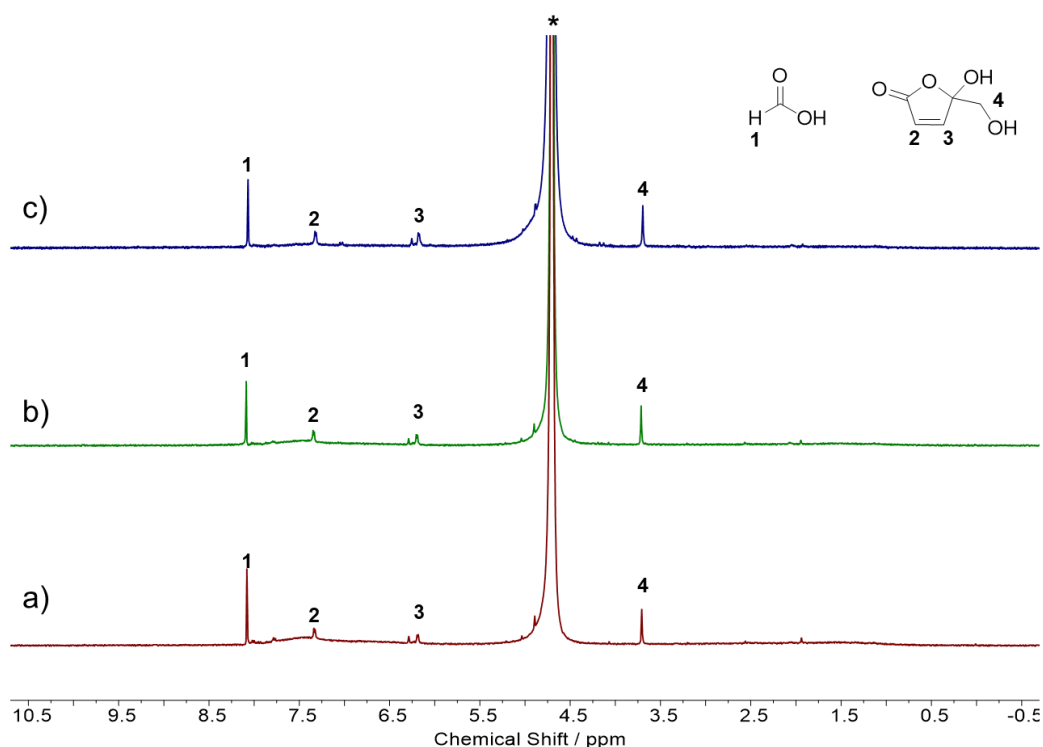

**Figure S7.**  $^1\text{H}$ -NMR spectra of TX@PS in the presence of 5-HMF upon irradiation (18h, 405 nm) with a) fresh catalyst, b) re-used catalyst (once) or c) re-used catalyst (twice); the signals labelled 1 correspond to the product formic acid, signals labelled 1 - 4 correspond to the product 5-(hydroxymethyl)-5-hydroxyfuran-2(5H)-one<sup>1</sup>; no signals corresponding to the educt 5-HMF are detected, indicating full conversion; spectra were recorded in  $\text{H}_2\text{O}-\text{d}_2$ ; the solvent peak is denoted by an asterisk

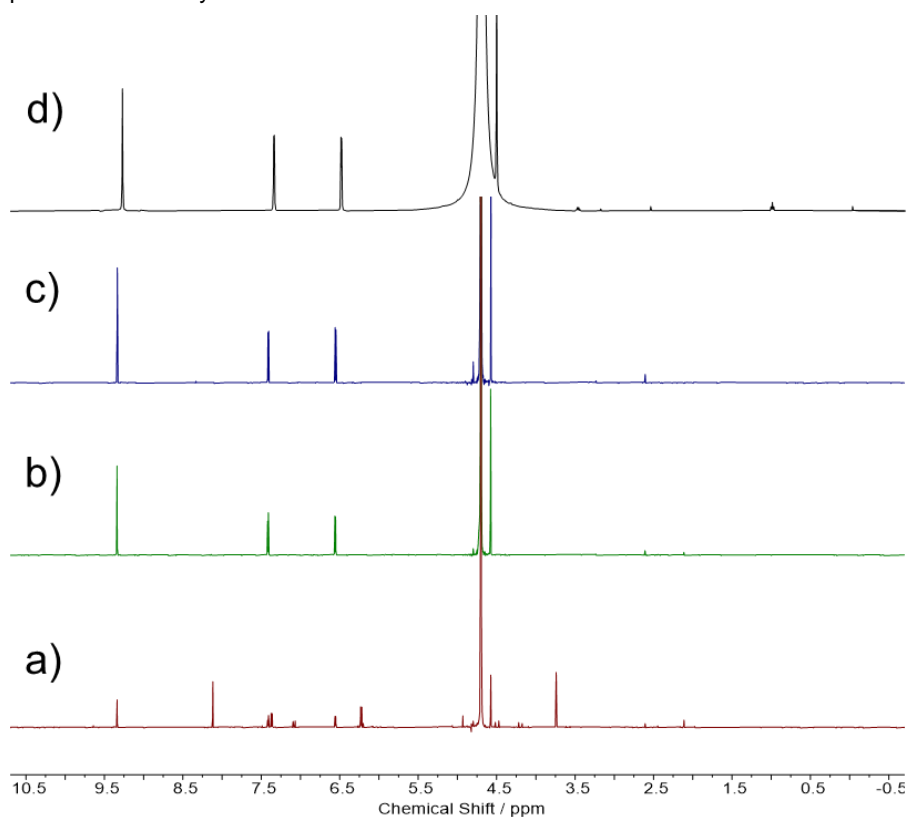

**Figure S8.** Reference  $^1\text{H}$ -NMR spectra of 5-HMF; a) in the presence of TX@PS upon irradiation for 4h; b) in the presence of TX@PS without irradiation (18h); c) in the absence of TX@PS upon irradiation (18h); d) in the presence of TX@PS without irradiation (18h) at elevated temperature ( $T = 70^\circ \text{C}$ ); spectra were recorded in  $\text{D}_2\text{O}-\text{d}_2$

## EPR Spectra

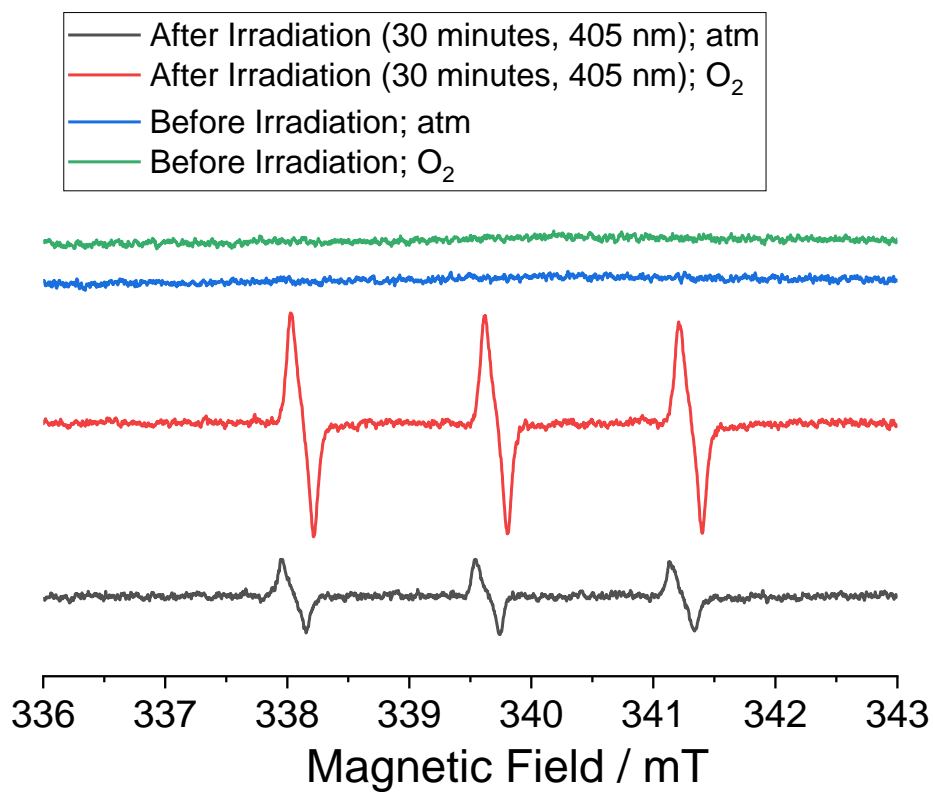

**Figure S9.** EPR spectra of **TX@PS** in the presence of TEMP before and after irradiation for 30 minutes inside a photoreactor ( $\lambda_{\text{max}} = 405 \text{ nm}$ ) and under atmospheric conditions or under O<sub>2</sub> atmosphere; the appearance of signals only after irradiation rationalizes the mechanism discussed in the main text



## Gas Sorption Measurements

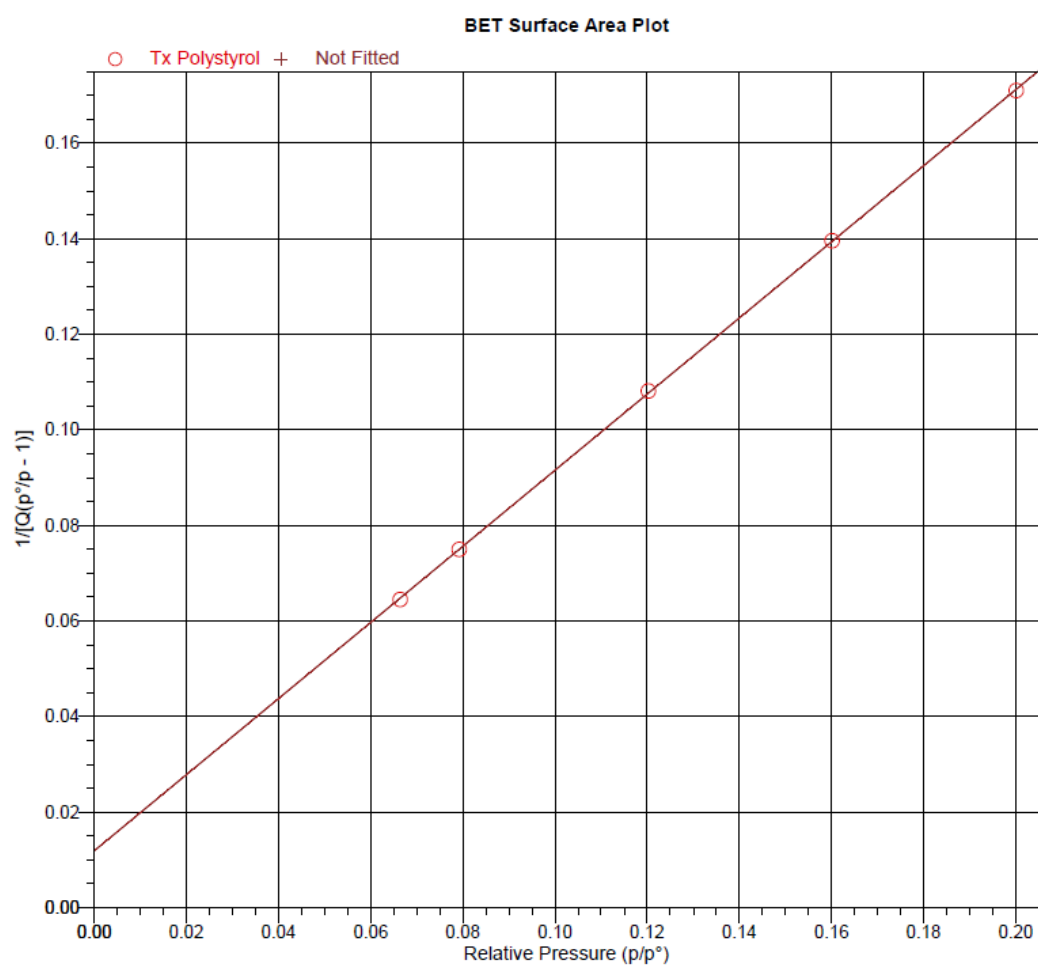

**Figure S10.** Brunauer-Emmett-Teller (BET) analysis of freshly prepared **TX@PS**

## References

- 1 T. S. A. Heugebaert, C. V. Stevens and C. O. Kappe, *ChemSusChem*, 2015, 8, 1648–1651.
